# Supplementary material for: Non-neural tyrosine hydroxylase, via modulation of endocrine pancreatic precursors, is required for normal development of beta cells in the mouse pancreas
Source: PubMed Central journal article supplement (PMC4181516; doi:10.1007/s00125-014-3341-6), 2014-08-01
Supplement: 125_2014_3341_MOESM8_ESM.pdf [file 125_2014_3341_MOESM8_ESM.pdf]

ESM Table 2. Taqman assays used in quantitative real-time PCR.

| <b>Gene</b>   | <b>Taqman Probe</b> |
|---------------|---------------------|
| <i>Th</i>     | Mm00447557_m1       |
| <i>Ins1</i>   | Mm01950294_s1       |
| <i>Ins2</i>   | Mm00731595_gH       |
| <i>Ngn3</i>   | Mm00437606_s1       |
| <i>Gcg</i>    | Mm01269055_m1       |
| <i>Nkx2.2</i> | Mm00839794_m1       |
| <i>Hes1</i>   | Mm01342805_m1       |
| <i>Sox10</i>  | Mm01300162_m1       |
| <i>Phox2b</i> | Mm00435872_m1       |
| <i>18S</i>    | Hs99999901_s1       |
